# Supplementary material
Source: Springer Nature journal article supplement (https://www.springermedizin.de/resource/supplementary/12911_2012_558_MOESM1_ESM.pdf/9525826)

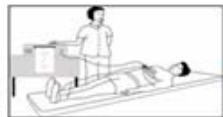

ECG Signal

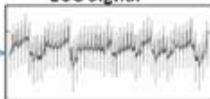

Preprocessing

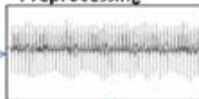

Prototype Distance Calculation  
With  
Non-linear Characterization

Complex Wavelet Decomposition

Attributes  
from  
Time Domain

Feature Selection  
And  
Parameter Tuning

Training &  
Classification

Report

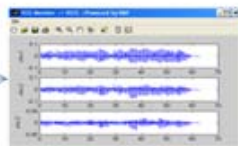

Supplement: MOESM1 [file 9525826]
